# Supplementary material for: Inhibition of astroglial NF-kappaB enhances oligodendrogenesis following spinal cord injury
Source: PubMed Central journal article supplement (PMC3751509; doi:10.1186/1742-2094-10-92), 2013-07-23

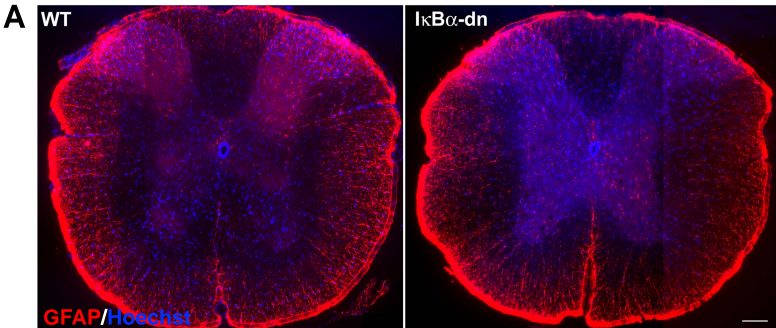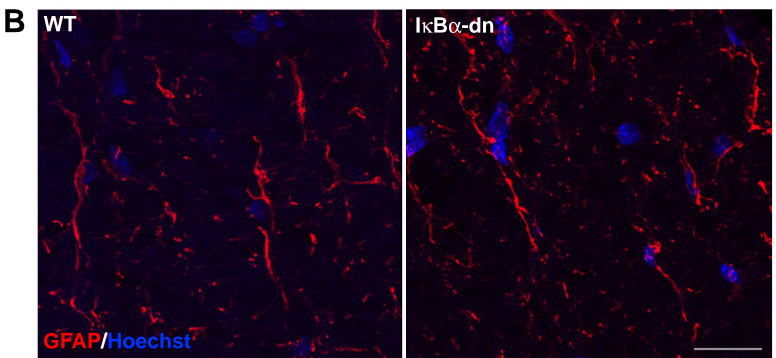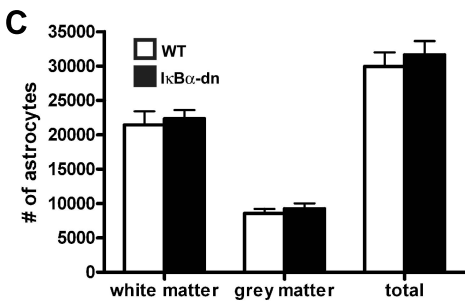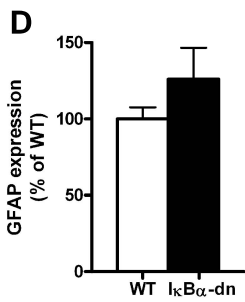

Supplement: 1742-2094-10-92-S1.pdf [file 1742-2094-10-92-S1.pdf]
